# Supplementary material for: Cabozantinib in Japanese patients with advanced hepatocellular carcinoma: a phase 2 multicenter study
Source: Springer Nature journal article supplement (doi:10.1007/s00535-020-01753-0), 2021-01-03

Supplementary Figure 1

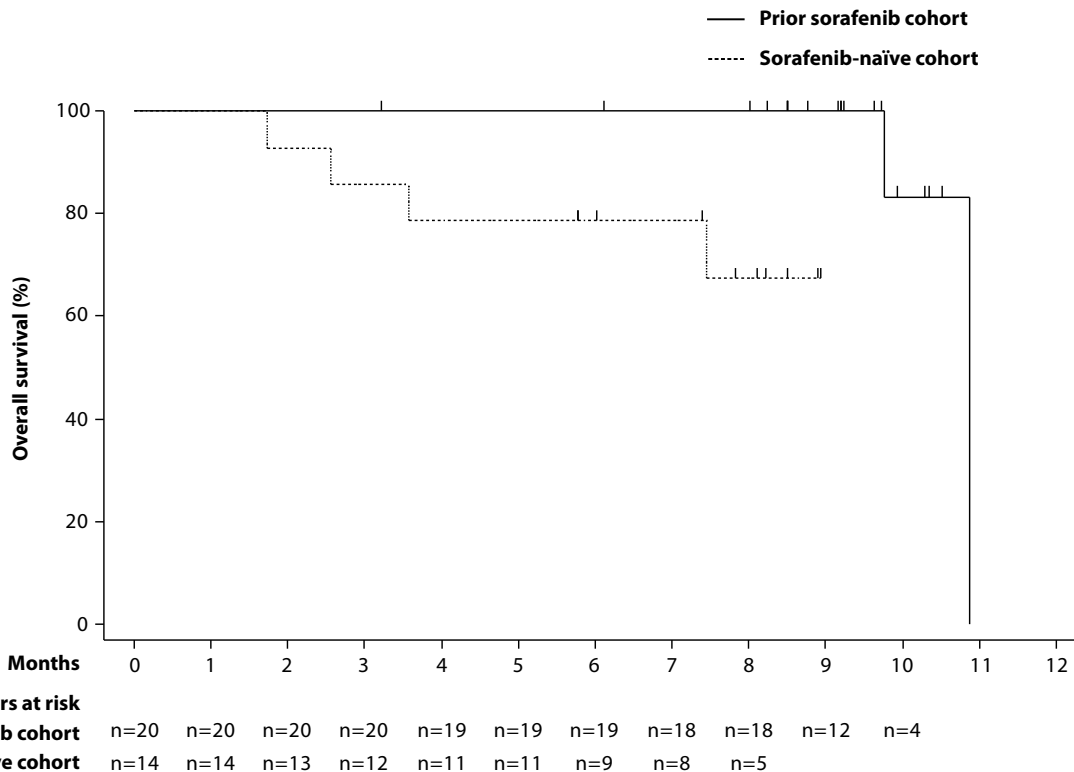

Supplement: MOESM1 [file 18720264]
